# Supplementary material for: Encapsulation of diatomic molecules in fullerene C60: implications for their main properties
Source: Royal Society of Chemistry journal article supplement (doi:10.1039/c4cp04069d), 2014-10-22
Supplement: c4cp04069d1.pdf [file c4cp04069d1.pdf]

**Electronic Supplementary Information**

**Encapsulation of diatomic molecules in fullerene C<sub>60</sub>: Implications for their main properties**

Grygoriy A. Dolgonos\*<sup>a</sup> and Gilles H. Peslherbe<sup>b</sup>

<sup>a</sup> Computational Centre of Chizevsky's Regional Scientific Library, 24 V. Perspektyvna str., Kirovograd, Ukraine 25006

<sup>b</sup> Centre for Research in Molecular Modeling (CERMM) and Department of Chemistry & Biochemistry, Concordia University, 7141 Sherbrooke St. West, Montréal, QC, Canada H4B1R6

\* Corresponding author

*E-mail address:* dolgonos@gmail.com (G. A. Dolgonos).

**Cartesian coordinates (in Å) of DF-LMP2/cc-pVTZ optimized structures of endohedral fullerene complexes of C<sub>60</sub> with the following guest molecules: H<sub>2</sub>, N<sub>2</sub>, O<sub>2</sub>, F<sub>2</sub>, HF, CO, LiH, LiF, BN and BeO.**

-----  
 Format:

```
{Total_number_of_atoms}
{Comment_line}
{Atom_line_number} {Atom} {X} {Y} {Z}
```

-----

62  
 DF-LMP2/VTZ optimized structure of H2@C60 (D5d)

|    |   |               |               |               |
|----|---|---------------|---------------|---------------|
| 1  | C | 0.8901374382  | 0.0649346510  | -0.8465710110 |
| 2  | C | -0.3400022467 | 0.8252027872  | -0.8465710110 |
| 3  | C | -1.1002703829 | 0.4450687191  | 0.3233613523  |
| 4  | C | -0.3400022467 | -0.5501351915 | 1.0464193174  |
| 5  | C | 0.8901374382  | -0.7850709658 | 0.3233613523  |
| 6  | C | 0.8901374382  | 0.0649346510  | 4.3435257922  |
| 7  | C | 0.8901374382  | -0.7850709658 | 3.1735934289  |
| 8  | C | -0.3400022467 | -0.5501351915 | 2.4505354639  |
| 9  | C | -1.1002703829 | 0.4450687191  | 3.1735934289  |
| 10 | C | -0.3400022467 | 0.8252027872  | 4.3435257922  |
| 11 | C | 0.8901374382  | 2.7756664404  | -1.7273411606 |
| 12 | C | 0.8901374382  | 4.1510044191  | -1.2804667623 |
| 13 | C | -0.3400022467 | 4.3859401935  | -0.5574087973 |
| 14 | C | -1.1002703829 | 3.1558005085  | -0.5574087973 |
| 15 | C | -0.3400022467 | 2.1605965980  | -1.2804667623 |
| 16 | C | 0.8901374382  | 2.7756664404  | 5.2242959418  |
| 17 | C | -0.3400022467 | 2.1605965980  | 4.7774215436  |
| 18 | C | -1.1002703829 | 3.1558005085  | 4.0543635785  |
| 19 | C | -0.3400022467 | 4.3859401935  | 4.0543635785  |
| 20 | C | 0.8901374382  | 4.1510044191  | 4.7774215436  |
| 21 | C | 2.0845499732  | 2.0374788972  | 5.2242959418  |
| 22 | C | 3.3146896582  | 2.6525487397  | 4.7774215436  |
| 23 | C | 4.0749577944  | 1.6573448291  | 4.0543635785  |
| 24 | C | 3.3146896582  | 0.4272051442  | 4.0543635785  |
| 25 | C | 2.0845499732  | 0.6621409185  | 4.7774215436  |
| 26 | C | 2.0845499732  | 0.6621409185  | -1.2804667623 |
| 27 | C | 3.3146896582  | 0.4272051442  | -0.5574087973 |
| 28 | C | 4.0749577944  | 1.6573448291  | -0.5574087973 |
| 29 | C | 3.3146896582  | 2.6525487397  | -1.2804667623 |
| 30 | C | 2.0845499732  | 2.0374788972  | -1.7273411606 |
| 31 | C | -1.8384579262 | 1.4113687582  | 1.0254194256  |
| 32 | C | -1.8384579262 | 2.7867067369  | 0.5785450273  |
| 33 | C | -1.8384579262 | 3.6367123537  | 1.7484773906  |
| 34 | C | -1.8384579262 | 2.7867067369  | 2.9184097539  |
| 35 | C | -1.8384579262 | 1.4113687582  | 2.4715353557  |
| 36 | C | 2.0845499732  | -1.0131834617 | 1.0254194256  |
| 37 | C | 2.0845499732  | -1.0131834617 | 2.4715353557  |
| 38 | C | 3.3146896582  | -0.3981136193 | 2.9184097539  |
| 39 | C | 4.0749577944  | -0.0179795512 | 1.7484773906  |
| 40 | C | 3.3146896582  | -0.3981136193 | 0.5785450273  |
| 41 | C | 4.8131453376  | 2.0264386007  | 2.9184097539  |
| 42 | C | 4.8131453376  | 3.4017765794  | 2.4715353557  |
| 43 | C | 4.8131453376  | 3.4017765794  | 1.0254194256  |
| 44 | C | 4.8131453376  | 2.0264386007  | 0.5785450273  |
| 45 | C | 4.8131453376  | 1.1764329839  | 1.7484773906  |
| 46 | C | 0.8901374382  | 5.8263287993  | 1.0254194256  |
| 47 | C | 0.8901374382  | 5.8263287993  | 2.4715353557  |

|    |   |               |              |               |
|----|---|---------------|--------------|---------------|
| 48 | C | -0.3400022467 | 5.2112589569 | 2.9184097539  |
| 49 | C | -1.1002703829 | 4.8311248888 | 1.7484773906  |
| 50 | C | -0.3400022467 | 5.2112589569 | 0.5785450273  |
| 51 | C | 4.0749577944  | 4.3680766185 | 0.3233613523  |
| 52 | C | 3.3146896582  | 5.3632805291 | 1.0464193174  |
| 53 | C | 2.0845499732  | 5.5982163034 | 0.3233613523  |
| 54 | C | 2.0845499732  | 4.7482106866 | -0.8465710110 |
| 55 | C | 3.3146896582  | 3.9879425504 | -0.8465710110 |
| 56 | C | 2.0845499732  | 4.7482106866 | 4.3435257922  |
| 57 | C | 2.0845499732  | 5.5982163034 | 3.1735934289  |
| 58 | C | 3.3146896582  | 5.3632805291 | 2.4505354639  |
| 59 | C | 4.0749577944  | 4.3680766185 | 3.1735934289  |
| 60 | C | 3.3146896582  | 3.9879425504 | 4.3435257922  |
| 61 | H | 1.3207363327  | 2.1369962765 | 1.5526186771  |
| 62 | H | 1.6539510787  | 2.6761490611 | 1.9443361042  |

-----

62

DF-LMP2/VTZ optimized structure of N2@C60 (D5d)

|    |   |               |               |               |
|----|---|---------------|---------------|---------------|
| 1  | C | 0.8901770097  | 0.0649375377  | -0.8466086457 |
| 2  | C | -0.3400173617 | 0.8252394720  | -0.8466086457 |
| 3  | C | -1.1003192960 | 0.4450885048  | 0.3233757275  |
| 4  | C | -0.3400173617 | -0.5501596480 | 1.0464658364  |
| 5  | C | 0.8901770097  | -0.7851058665 | 0.3233757275  |
| 6  | C | 0.8901770097  | 0.0649375377  | 4.3441040668  |
| 7  | C | 0.8901770097  | -0.7851058665 | 3.1741196936  |
| 8  | C | -0.3400173617 | -0.5501596480 | 2.4510295847  |
| 9  | C | -1.1003192960 | 0.4450885048  | 3.1741196936  |
| 10 | C | -0.3400173617 | 0.8252394720  | 4.3441040668  |
| 11 | C | 0.8901770097  | 2.7761561630  | -1.7275369779 |
| 12 | C | 0.8901770097  | 4.1515552830  | -1.2806427136 |
| 13 | C | -0.3400173617 | 4.3865015015  | -0.5575526047 |
| 14 | C | -1.1003192960 | 3.1563071301  | -0.5575526047 |
| 15 | C | -0.3400173617 | 2.1610589773  | -1.2806427136 |
| 16 | C | 0.8901770097  | 2.7761561630  | 5.2250323990  |
| 17 | C | -0.3400173617 | 2.1610589773  | 4.7781381347  |
| 18 | C | -1.1003192960 | 3.1563071301  | 4.0550480258  |
| 19 | C | -0.3400173617 | 4.3865015015  | 4.0550480258  |
| 20 | C | 0.8901770097  | 4.1515552830  | 4.7781381347  |
| 21 | C | 2.0849702975  | 2.0377333016  | 5.2250323990  |
| 22 | C | 3.3151646689  | 2.6528304873  | 4.7781381347  |
| 23 | C | 4.0754666032  | 1.6575823344  | 4.0550480258  |
| 24 | C | 3.3151646689  | 0.4273879631  | 4.0550480258  |
| 25 | C | 2.0849702975  | 0.6623341816  | 4.7781381347  |
| 26 | C | 2.0849702975  | 0.6623341816  | -1.2806427136 |
| 27 | C | 3.3151646689  | 0.4273879631  | -0.5575526047 |
| 28 | C | 4.0754666032  | 1.6575823344  | -0.5575526047 |
| 29 | C | 3.3151646689  | 2.6528304873  | -1.2806427136 |
| 30 | C | 2.0849702975  | 2.0377333016  | -1.7275369779 |
| 31 | C | -1.8387421574 | 1.4116965795  | 1.0256576016  |
| 32 | C | -1.8387421574 | 2.7870956994  | 0.5787633374  |
| 33 | C | -1.8387421574 | 3.6371391037  | 1.7487477106  |
| 34 | C | -1.8387421574 | 2.7870956994  | 2.9187320838  |
| 35 | C | -1.8387421574 | 1.4116965795  | 2.4718378195  |
| 36 | C | 2.0849702975  | -1.0132910797 | 1.0256576016  |
| 37 | C | 2.0849702975  | -1.0132910797 | 2.4718378195  |
| 38 | C | 3.3151646689  | -0.3981938941 | 2.9187320838  |
| 39 | C | 4.0754666032  | -0.0180429269 | 1.7487477106  |
| 40 | C | 3.3151646689  | -0.3981938941 | 0.5787633374  |

|    |   |               |              |               |
|----|---|---------------|--------------|---------------|
| 41 | C | 4.8138894646  | 2.0267937651 | 2.9187320838  |
| 42 | C | 4.8138894646  | 3.4021928851 | 2.4718378195  |
| 43 | C | 4.8138894646  | 3.4021928851 | 1.0256576016  |
| 44 | C | 4.8138894646  | 2.0267937651 | 0.5787633374  |
| 45 | C | 4.8138894646  | 1.1767503609 | 1.7487477106  |
| 46 | C | 0.8901770097  | 5.8271805443 | 1.0256576016  |
| 47 | C | 0.8901770097  | 5.8271805443 | 2.4718378195  |
| 48 | C | -0.3400173617 | 5.2120833586 | 2.9187320838  |
| 49 | C | -1.1003192960 | 4.8319323915 | 1.7487477106  |
| 50 | C | -0.3400173617 | 5.2120833586 | 0.5787633374  |
| 51 | C | 4.0754666032  | 4.3688009597 | 0.3233757275  |
| 52 | C | 3.3151646689  | 5.3640491126 | 1.0464658364  |
| 53 | C | 2.0849702975  | 5.5989953311 | 0.3233757275  |
| 54 | C | 2.0849702975  | 4.7489519269 | -0.8466086457 |
| 55 | C | 3.3151646689  | 3.9886499926 | -0.8466086457 |
| 56 | C | 2.0849702975  | 4.7489519269 | 4.3441040668  |
| 57 | C | 2.0849702975  | 5.5989953311 | 3.1741196936  |
| 58 | C | 3.3151646689  | 5.3640491126 | 2.4510295847  |
| 59 | C | 4.0754666032  | 4.3688009597 | 3.1741196936  |
| 60 | C | 3.3151646689  | 3.9886499926 | 4.3441040668  |
| 61 | N | 1.2369225509  | 2.0013827288 | 1.4540896673  |
| 62 | N | 1.7382247563  | 2.8125067358 | 2.0434057538  |

-----

62

DF-LMP2/VTZ optimized structure of O2@C60 (Ci)

|    |   |               |               |               |
|----|---|---------------|---------------|---------------|
| 1  | C | -0.5977466690 | -2.3449641598 | -2.5991102037 |
| 2  | C | -1.8284038586 | -1.5851464289 | -2.5985276760 |
| 3  | C | -2.5909648463 | -1.9660899517 | -1.4290841736 |
| 4  | C | -1.8300937017 | -2.9608781859 | -0.7059074168 |
| 5  | C | -0.5985104819 | -3.1945759035 | -1.4289349618 |
| 6  | C | -0.5993580741 | -2.3404664609 | 2.5917071677  |
| 7  | C | -0.5993185893 | -3.1905807588 | 1.4219783337  |
| 8  | C | -1.8306175821 | -2.9586192281 | 0.6993343572  |
| 9  | C | -2.5922906160 | -1.9648331100 | 1.4238383099  |
| 10 | C | -1.8303049105 | -1.5823794407 | 2.5923365488  |
| 11 | C | -0.5959459973 | 0.3678118701  | -3.4751724830 |
| 12 | C | -0.5948950360 | 1.7423784014  | -3.0264143045 |
| 13 | C | -1.8251321548 | 1.9764015188  | -2.3038697780 |
| 14 | C | -2.5858247703 | 0.7464010325  | -2.3054758712 |
| 15 | C | -1.8262186103 | -0.2483692995 | -3.0299889053 |
| 16 | C | -0.5985938430 | 0.3692979205  | 3.4743638592  |
| 17 | C | -1.8280680603 | -0.2469471263 | 3.0265402927  |
| 18 | C | -2.5878835559 | 0.7475206391  | 2.3037617001  |
| 19 | C | -1.8272883146 | 1.9776668812  | 2.3056134191  |
| 20 | C | -0.5974677303 | 1.7450024816  | 3.0295384048  |
| 21 | C | 0.5959730382  | -0.3677817710 | 3.4752130620  |
| 22 | C | 1.8262485348  | 0.2483983232  | 3.0300321393  |
| 23 | C | 2.5858511246  | -0.7463708137 | 2.3055126349  |
| 24 | C | 1.8251565128  | -1.9763694973 | 2.3039042127  |
| 25 | C | 0.5949196466  | -1.7423475459 | 3.0264513934  |
| 26 | C | 0.5974933888  | -1.7449772499 | -3.0295046357 |
| 27 | C | 1.8273146082  | -1.9776381533 | -2.3055781993 |
| 28 | C | 2.5879099262  | -0.7474914286 | -2.3037246682 |
| 29 | C | 1.8280939385  | 0.2469744940  | -3.0265037221 |
| 30 | C | 0.5986189062  | -0.3692701977 | -3.4743259777 |
| 31 | C | -3.3291543867 | -0.9994927260 | -0.7247889916 |
| 32 | C | -3.3253825699 | 0.3766986793  | -1.1701435650 |
| 33 | C | -3.3248456234 | 1.2266978786  | -0.0002532501 |

|    |   |               |               |               |
|----|---|---------------|---------------|---------------|
| 34 | C | -3.3272904666 | 0.3766314236  | 1.1688776816  |
| 35 | C | -3.3310284386 | -0.9990274800 | 0.7218597278  |
| 36 | C | 0.5965421133  | -3.4196970883 | -0.7257711624 |
| 37 | C | 0.5957915476  | -3.4181202707 | 0.7203056739  |
| 38 | C | 1.8252046191  | -2.8018272455 | 1.1678616262  |
| 39 | C | 2.5861117267  | -2.4213513813 | -0.0010482716 |
| 40 | C | 1.8268337946  | -2.8035488953 | -1.1707805931 |
| 41 | C | 3.3254136505  | -0.3766705556 | 1.1701801063  |
| 42 | C | 3.3291909514  | 0.9995213133  | 0.7248249883  |
| 43 | C | 3.3310610181  | 0.9990555814  | -0.7218232904 |
| 44 | C | 3.3273228080  | -0.3766028546 | -1.1688432496 |
| 45 | C | 3.3248745942  | -1.2266695492 | 0.0002879919  |
| 46 | C | -0.5957682718 | 3.4181486741  | -0.7202713678 |
| 47 | C | -0.5965165408 | 3.4197182245  | 0.7258032071  |
| 48 | C | -1.8268092507 | 2.8035764273  | 1.1708148680  |
| 49 | C | -2.5860890339 | 2.4213827066  | 0.0010820580  |
| 50 | C | -1.8251820547 | 2.8018607061  | -1.1678285340 |
| 51 | C | 2.5923150604  | 1.9648562444  | -1.4238018749 |
| 52 | C | 1.8306378598  | 2.9586374153  | -0.6992976193 |
| 53 | C | 0.5993423098  | 3.1906062004  | -1.4219411356 |
| 54 | C | 0.5993826313  | 2.3404960595  | -2.5916716520 |
| 55 | C | 1.8303297572  | 1.5824060571  | -2.5923003711 |
| 56 | C | 0.5977731112  | 2.3449821302  | 2.5991404999  |
| 57 | C | 0.5985345453  | 3.1945875289  | 1.4289636671  |
| 58 | C | 1.8301160145  | 2.9608908002  | 0.7059414053  |
| 59 | C | 2.5909949911  | 1.9661129152  | 1.4291216521  |
| 60 | C | 1.8284350738  | 1.5851727727  | 2.5985663415  |
| 61 | O | -0.4282901147 | -0.4267812141 | -0.1915492916 |
| 62 | O | 0.4287091032  | 0.4259776709  | 0.1916716190  |

-----

62

DF-LMP2/VTZ optimized structure of F2@C60 (D2h)

|    |   |              |              |              |
|----|---|--------------|--------------|--------------|
| 1  | C | -1.170142361 | 3.029627393  | -1.425458175 |
| 2  | C | 0.000000000  | 3.476582003  | -0.702270382 |
| 3  | C | 1.170142361  | 3.029627393  | -1.425458175 |
| 4  | C | 0.723187751  | 2.306439642  | -2.595600605 |
| 5  | C | -0.723187751 | 2.306439642  | -2.595600605 |
| 6  | C | 1.425458091  | -1.170142361 | -3.029627570 |
| 7  | C | 0.702270340  | 0.000000000  | -3.476582207 |
| 8  | C | 1.425458091  | 1.170142361  | -3.029627570 |
| 9  | C | 2.595600453  | 0.723187751  | -2.306439777 |
| 10 | C | 2.595600453  | -0.723187751 | -2.306439777 |
| 11 | C | -1.170142361 | 3.029627393  | 1.425458175  |
| 12 | C | -0.723187751 | 2.306439642  | 2.595600605  |
| 13 | C | 0.723187751  | 2.306439642  | 2.595600605  |
| 14 | C | 1.170142361  | 3.029627393  | 1.425458175  |
| 15 | C | 0.000000000  | 3.476582003  | 0.702270382  |
| 16 | C | 2.306439642  | -2.595600453 | -0.723187793 |
| 17 | C | 3.029627393  | -1.425458091 | -1.170142430 |
| 18 | C | 3.476582003  | -0.702270340 | 0.000000000  |
| 19 | C | 3.029627393  | -1.425458091 | 1.170142430  |
| 20 | C | 2.306439642  | -2.595600453 | 0.723187793  |
| 21 | C | 1.170142361  | -3.029627393 | -1.425458175 |
| 22 | C | 0.000000000  | -3.476582003 | -0.702270382 |
| 23 | C | -1.170142361 | -3.029627393 | -1.425458175 |
| 24 | C | -0.723187751 | -2.306439642 | -2.595600605 |
| 25 | C | 0.723187751  | -2.306439642 | -2.595600605 |
| 26 | C | -2.306439642 | 2.595600453  | -0.723187793 |

|    |   |              |              |              |
|----|---|--------------|--------------|--------------|
| 27 | C | -3.029627393 | 1.425458091  | -1.170142430 |
| 28 | C | -3.476582003 | 0.702270340  | 0.000000000  |
| 29 | C | -3.029627393 | 1.425458091  | 1.170142430  |
| 30 | C | -2.306439642 | 2.595600453  | 0.723187793  |
| 31 | C | 2.306439642  | 2.595600453  | -0.723187793 |
| 32 | C | 2.306439642  | 2.595600453  | 0.723187793  |
| 33 | C | 3.029627393  | 1.425458091  | 1.170142430  |
| 34 | C | 3.476582003  | 0.702270340  | 0.000000000  |
| 35 | C | 3.029627393  | 1.425458091  | -1.170142430 |
| 36 | C | -1.425458091 | 1.170142361  | -3.029627570 |
| 37 | C | -0.702270340 | 0.000000000  | -3.476582207 |
| 38 | C | -1.425458091 | -1.170142361 | -3.029627570 |
| 39 | C | -2.595600453 | -0.723187751 | -2.306439777 |
| 40 | C | -2.595600453 | 0.723187751  | -2.306439777 |
| 41 | C | -2.306439642 | -2.595600453 | -0.723187793 |
| 42 | C | -2.306439642 | -2.595600453 | 0.723187793  |
| 43 | C | -3.029627393 | -1.425458091 | 1.170142430  |
| 44 | C | -3.476582003 | -0.702270340 | 0.000000000  |
| 45 | C | -3.029627393 | -1.425458091 | -1.170142430 |
| 46 | C | 0.702270340  | 0.000000000  | 3.476582207  |
| 47 | C | 1.425458091  | -1.170142361 | 3.029627570  |
| 48 | C | 2.595600453  | -0.723187751 | 2.306439777  |
| 49 | C | 2.595600453  | 0.723187751  | 2.306439777  |
| 50 | C | 1.425458091  | 1.170142361  | 3.029627570  |
| 51 | C | -2.595600453 | -0.723187751 | 2.306439777  |
| 52 | C | -1.425458091 | -1.170142361 | 3.029627570  |
| 53 | C | -0.702270340 | 0.000000000  | 3.476582207  |
| 54 | C | -1.425458091 | 1.170142361  | 3.029627570  |
| 55 | C | -2.595600453 | 0.723187751  | 2.306439777  |
| 56 | C | 1.170142361  | -3.029627393 | 1.425458175  |
| 57 | C | 0.723187751  | -2.306439642 | 2.595600605  |
| 58 | C | -0.723187751 | -2.306439642 | 2.595600605  |
| 59 | C | -1.170142361 | -3.029627393 | 1.425458175  |
| 60 | C | 0.000000000  | -3.476582003 | 0.702270382  |
| 61 | F | 0.000000000  | 0.000000000  | 0.707193062  |
| 62 | F | 0.000000000  | 0.000000000  | -0.707193063 |

-----

62

DF-LMP2/VTZ optimized structure of HF@C60 (C1)

|    |   |               |               |               |
|----|---|---------------|---------------|---------------|
| 1  | C | -0.8942732251 | 0.0621068330  | -0.8525650704 |
| 2  | C | 0.3354461092  | 0.8237089328  | -0.8528067098 |
| 3  | C | 1.0950120717  | 0.4448833802  | 0.3188995329  |
| 4  | C | 0.3345229233  | -0.5518405124 | 1.0425465930  |
| 5  | C | -0.8950817211 | -0.7879144603 | 0.3178633607  |
| 6  | C | -0.8927675772 | 0.0618961505  | 4.3431836081  |
| 7  | C | -0.8942538382 | -0.7877098325 | 3.1727784763  |
| 8  | C | 0.3352449949  | -0.5517732428 | 2.4482612878  |
| 9  | C | 1.0965620306  | 0.4441036342  | 3.1719470128  |
| 10 | C | 0.3370563210  | 0.8229553075  | 4.3432191431  |
| 11 | C | -0.8936462006 | 2.7758530041  | -1.7306292059 |
| 12 | C | -0.8927334593 | 4.1508567529  | -1.2837459475 |
| 13 | C | 0.3370786453  | 4.3857535452  | -0.5607475040 |
| 14 | C | 1.0971772889  | 3.1558018250  | -0.5609943263 |
| 15 | C | 0.3362154380  | 2.1603974388  | -1.2843330279 |
| 16 | C | -0.8918991583 | 2.7746421571  | 5.2217437949  |
| 17 | C | 0.3377254870  | 2.1593201797  | 4.7748838990  |
| 18 | C | 1.0982751571  | 3.1549057479  | 4.0517810157  |
| 19 | C | 0.3381444162  | 4.3847798392  | 4.0519287297  |

|    |   |               |               |               |
|----|---|---------------|---------------|---------------|
| 20 | C | -0.8913570767 | 4.1497025526  | 4.7752704788  |
| 21 | C | -2.0859539958 | 2.0363427509  | 5.2211293934  |
| 22 | C | -3.3157732280 | 2.6513042641  | 4.7746088409  |
| 23 | C | -4.0761446803 | 1.6566727916  | 4.0518272344  |
| 24 | C | -3.3165531172 | 0.4266217219  | 4.0513739475  |
| 25 | C | -2.0866819224 | 0.6610951247  | 4.7746318816  |
| 26 | C | -2.0883863711 | 0.6617820256  | -1.2833769294 |
| 27 | C | -3.3179079295 | 0.4271500494  | -0.5595369981 |
| 28 | C | -4.0774263942 | 1.6572622757  | -0.5593734148 |
| 29 | C | -3.3173422048 | 2.6521112136  | -1.2821742113 |
| 30 | C | -2.0877073207 | 2.0373058646  | -1.7294714939 |
| 31 | C | 1.8345326715  | 1.4122471505  | 1.0218644066  |
| 32 | C | 1.8373240725  | 2.7882890218  | 0.5748172021  |
| 33 | C | 1.8391131366  | 3.6376018909  | 1.7456785783  |
| 34 | C | 1.8383809926  | 2.7876846728  | 2.9161823645  |
| 35 | C | 1.8356185448  | 1.4117351124  | 2.4694382533  |
| 36 | C | -2.0887323026 | -1.0139683877 | 1.0223389258  |
| 37 | C | -2.0882095077 | -1.0140057262 | 2.4688904552  |
| 38 | C | -3.3178493314 | -0.3987043200 | 2.9157297777  |
| 39 | C | -4.0780020838 | -0.0187048096 | 1.7461604592  |
| 40 | C | -3.3184930501 | -0.3984150862 | 0.5760680187  |
| 41 | C | -4.8138263373 | 2.0258292442  | 2.9161694537  |
| 42 | C | -4.8137025166 | 3.4008222983  | 2.4695456458  |
| 43 | C | -4.8139839666 | 3.4010043415  | 1.0238434733  |
| 44 | C | -4.8143361753 | 2.0261265471  | 0.5768496997  |
| 45 | C | -4.8143092244 | 1.1761676774  | 1.7464131560  |
| 46 | C | -0.8918775170 | 5.8248300620  | 1.0233821102  |
| 47 | C | -0.8915198486 | 5.8247083730  | 2.4690287611  |
| 48 | C | 0.3381558369  | 5.2095946674  | 2.9157775841  |
| 49 | C | 1.0982594196  | 4.8301859563  | 1.7457284726  |
| 50 | C | 0.3376233775  | 5.2098510839  | 0.5759599416  |
| 51 | C | -4.0760313037 | 4.3669738419  | 0.3219662519  |
| 52 | C | -3.3156382434 | 5.3616367759  | 1.0447683575  |
| 53 | C | -2.0859246345 | 5.5963914546  | 0.3217660282  |
| 54 | C | -2.0864217284 | 4.7468228845  | -0.8480870291 |
| 55 | C | -3.3163713246 | 3.9868623385  | -0.8478489628 |
| 56 | C | -2.0852066642 | 4.7460706642  | 4.3405954714  |
| 57 | C | -2.0852609410 | 5.5959939823  | 3.1710045086  |
| 58 | C | -3.3152906320 | 5.3614231137  | 2.4484438308  |
| 59 | C | -4.0753946341 | 4.3665874124  | 3.1713495910  |
| 60 | C | -3.3151781884 | 3.9861886976  | 4.3407255779  |
| 61 | H | -0.6222798669 | 1.8108109674  | 1.6525697287  |
| 62 | F | -1.3857731338 | 2.3331648879  | 1.7346103038  |

62

DF-LMP2/VTZ optimized structure of CO@C60 (C5v)

|    |   |               |               |               |
|----|---|---------------|---------------|---------------|
| 1  | C | 0.8902484812  | 0.0649427515  | -0.8466766192 |
| 2  | C | -0.3400446614 | 0.8253057297  | -0.8466766192 |
| 3  | C | -1.1004076396 | 0.4451242406  | 0.3234016910  |
| 4  | C | -0.3400446614 | -0.5502038198 | 1.0465498562  |
| 5  | C | 0.8902484812  | -0.7851689020 | 0.3234016910  |
| 6  | C | 0.8902484812  | 0.0649427515  | 4.3444244208  |
| 7  | C | 0.8902484812  | -0.7851689020 | 3.1743461106  |
| 8  | C | -0.3400446614 | -0.5502038198 | 2.4511979454  |
| 9  | C | -1.1004076396 | 0.4451242406  | 3.1743461106  |
| 10 | C | -0.3400446614 | 0.8253057297  | 4.3444244208  |
| 11 | C | 0.8902484812  | 2.7763520193  | -1.7276668948 |
| 12 | C | 0.8902484812  | 4.1518615689  | -1.2807367498 |

|    |   |               |               |               |
|----|---|---------------|---------------|---------------|
| 13 | C | -0.3400446614 | 4.3868266510  | -0.5575885846 |
| 14 | C | -1.1004076396 | 3.1565335084  | -0.5575885846 |
| 15 | C | -0.3400446614 | 2.1612054480  | -1.2807367498 |
| 16 | C | 0.8902484812  | 2.7763520193  | 5.2254146965  |
| 17 | C | -0.3400446614 | 2.1612054480  | 4.7784845515  |
| 18 | C | -1.1004076396 | 3.1565335084  | 4.0553363863  |
| 19 | C | -0.3400446614 | 4.3868266510  | 4.0553363863  |
| 20 | C | 0.8902484812  | 4.1518615689  | 4.7784845515  |
| 21 | C | 2.0851135137  | 2.0378848173  | 5.2254146965  |
| 22 | C | 3.3154066563  | 2.6530313886  | 4.7784845515  |
| 23 | C | 4.0757696345  | 1.6577033281  | 4.0553363863  |
| 24 | C | 3.3154066563  | 0.4274101856  | 4.0553363863  |
| 25 | C | 2.0851135137  | 0.6623752677  | 4.7784845515  |
| 26 | C | 2.0851135137  | 0.6623752677  | -1.2807367498 |
| 27 | C | 3.3154066563  | 0.4274101856  | -0.5575885846 |
| 28 | C | 4.0757696345  | 1.6577033281  | -0.5575885846 |
| 29 | C | 3.3154066563  | 2.6530313886  | -1.2807367498 |
| 30 | C | 2.0851135137  | 2.0378848173  | -1.7276668948 |
| 31 | C | -1.8388748417 | 1.4117903579  | 1.0257257356  |
| 32 | C | -1.8388748417 | 2.7872999074  | 0.5787955906  |
| 33 | C | -1.8388748417 | 3.6374115609  | 1.7488739008  |
| 34 | C | -1.8388748417 | 2.7872999074  | 2.9189522110  |
| 35 | C | -1.8388748417 | 1.4117903579  | 2.4720220660  |
| 36 | C | 2.0851135137  | -1.0133678172 | 1.0257257356  |
| 37 | C | 2.0851135137  | -1.0133678172 | 2.4720220660  |
| 38 | C | 3.3154066563  | -0.3982212459 | 2.9189522110  |
| 39 | C | 4.0757696345  | -0.0180397568 | 1.7488739008  |
| 40 | C | 3.3154066563  | -0.3982212459 | 0.5787955906  |
| 41 | C | 4.8142368366  | 2.0269369292  | 2.9189522110  |
| 42 | C | 4.8142368366  | 3.4024464787  | 2.4720220660  |
| 43 | C | 4.8142368366  | 3.4024464787  | 1.0257257356  |
| 44 | C | 4.8142368366  | 2.0269369292  | 0.5787955906  |
| 45 | C | 4.8142368366  | 1.1768252757  | 1.7488739008  |
| 46 | C | 0.8902484812  | 5.8276046538  | 1.0257257356  |
| 47 | C | 0.8902484812  | 5.8276046538  | 2.4720220660  |
| 48 | C | -0.3400446614 | 5.2124580825  | 2.9189522110  |
| 49 | C | -1.1004076396 | 4.8322765934  | 1.7488739008  |
| 50 | C | -0.3400446614 | 5.2124580825  | 0.5787955906  |
| 51 | C | 4.0757696345  | 4.3691125960  | 0.3234016910  |
| 52 | C | 3.3154066563  | 5.3644406564  | 1.0465498562  |
| 53 | C | 2.0851135137  | 5.5994057386  | 0.3234016910  |
| 54 | C | 2.0851135137  | 4.7492940851  | -0.8466766192 |
| 55 | C | 3.3154066563  | 3.9889311069  | -0.8466766192 |
| 56 | C | 2.0851135137  | 4.7492940851  | 4.3444244208  |
| 57 | C | 2.0851135137  | 5.5994057386  | 3.1743461106  |
| 58 | C | 3.3154066563  | 5.3644406564  | 2.4511979454  |
| 59 | C | 4.0757696345  | 4.3691125960  | 3.1743461106  |
| 60 | C | 3.3154066563  | 3.9889311069  | 4.3444244208  |
| 61 | C | 1.2676385680  | 2.0510822885  | 1.4901985111  |
| 62 | O | 1.7783526193  | 2.8774349819  | 2.0905788860  |

62

DF-LMP2/VTZ optimized structure of LiH@C60 (C5v)

|   |   |               |               |               |
|---|---|---------------|---------------|---------------|
| 1 | C | -0.8900729731 | 0.0649299483  | -0.8465097011 |
| 2 | C | 0.3399776233  | 0.8251430248  | -0.8465097011 |
| 3 | C | 1.1001906997  | 0.4450364866  | 0.3233379340  |
| 4 | C | 0.3399776233  | -0.5500953499 | 1.0463435341  |
| 5 | C | -0.8900729731 | -0.7850141098 | 0.3233379340  |



|    |    |               |               |               |
|----|----|---------------|---------------|---------------|
| 6  | C  | -0.8900729731 | 0.0649299483  | 4.3438763646  |
| 7  | C  | -0.8900729731 | -0.7850141098 | 3.1740287295  |
| 8  | C  | 0.3399776233  | -0.5500953499 | 2.4510231294  |
| 9  | C  | 1.1001906997  | 0.4450364866  | 3.1740287295  |
| 10 | C  | 0.3399776233  | 0.8251430248  | 4.3438763646  |
| 11 | C  | -0.8900729731 | 2.7760980054  | -1.7274216026 |
| 12 | C  | -0.8900729731 | 4.1513363800  | -1.2805795677 |
| 13 | C  | 0.3399776233  | 4.3862551400  | -0.5575739675 |
| 14 | C  | 1.1001906997  | 3.1562045436  | -0.5575739675 |
| 15 | C  | 0.3399776233  | 2.1610727072  | -1.2805795677 |
| 16 | C  | -0.8900729731 | 2.7760980054  | 5.2247882661  |
| 17 | C  | 0.3399776233  | 2.1610727072  | 4.7779462312  |
| 18 | C  | 1.1001906997  | 3.1562045436  | 4.0549406311  |
| 19 | C  | 0.3399776233  | 4.3862551400  | 4.0549406311  |
| 20 | C  | -0.8900729731 | 4.1513363800  | 4.7779462312  |
| 21 | C  | -2.0849648063 | 2.0376142396  | 5.2247882661  |
| 22 | C  | -3.3150154027 | 2.6526395378  | 4.7779462312  |
| 23 | C  | -4.0752284792 | 1.6575077014  | 4.0549406311  |
| 24 | C  | -3.3150154027 | 0.4274571050  | 4.0549406311  |
| 25 | C  | -2.0849648063 | 0.6623758649  | 4.7779462312  |
| 26 | C  | -2.0849648063 | 0.6623758649  | -1.2805795677 |
| 27 | C  | -3.3150154027 | 0.4274571050  | -0.5575739675 |
| 28 | C  | -4.0752284792 | 1.6575077014  | -0.5575739675 |
| 29 | C  | -3.3150154027 | 2.6526395378  | -1.2805795677 |
| 30 | C  | -2.0849648063 | 2.0376142396  | -1.7274216026 |
| 31 | C  | 1.8386744655  | 1.4117242861  | 1.0256777316  |
| 32 | C  | 1.8386744655  | 2.7869626607  | 0.5788356967  |
| 33 | C  | 1.8386744655  | 3.6369067189  | 1.7486833318  |
| 34 | C  | 1.8386744655  | 2.7869626607  | 2.9185309668  |
| 35 | C  | 1.8386744655  | 1.4117242861  | 2.4716889319  |
| 36 | C  | -2.0849648063 | -1.0132181435 | 1.0256777316  |
| 37 | C  | -2.0849648063 | -1.0132181435 | 2.4716889319  |
| 38 | C  | -3.3150154027 | -0.3981928453 | 2.9185309668  |
| 39 | C  | -4.0752284792 | -0.0180863071 | 1.7486833318  |
| 40 | C  | -3.3150154027 | -0.3981928453 | 0.5788356967  |
| 41 | C  | -4.8137122449 | 2.0267495842  | 2.9185309668  |
| 42 | C  | -4.8137122449 | 3.4019879589  | 2.4716889319  |
| 43 | C  | -4.8137122449 | 3.4019879589  | 1.0256777316  |
| 44 | C  | -4.8137122449 | 2.0267495842  | 0.5788356967  |
| 45 | C  | -4.8137122449 | 1.1768055261  | 1.7486833318  |
| 46 | C  | -0.8900729731 | 5.8269303885  | 1.0256777316  |
| 47 | C  | -0.8900729731 | 5.8269303885  | 2.4716889319  |
| 48 | C  | 0.3399776233  | 5.2119050903  | 2.9185309668  |
| 49 | C  | 1.1001906997  | 4.8317985520  | 1.7486833318  |
| 50 | C  | 0.3399776233  | 5.2119050903  | 0.5788356967  |
| 51 | C  | -4.0752284792 | 4.3686757584  | 0.3233379340  |
| 52 | C  | -3.3150154027 | 5.3638075948  | 1.0463435341  |
| 53 | C  | -2.0849648063 | 5.5987263548  | 0.3233379340  |
| 54 | C  | -2.0849648063 | 4.7487822966  | -0.8465097011 |
| 55 | C  | -3.3150154027 | 3.9885692202  | -0.8465097011 |
| 56 | C  | -2.0849648063 | 4.7487822966  | 4.3438763646  |
| 57 | C  | -2.0849648063 | 5.5987263548  | 3.1740287295  |
| 58 | C  | -3.3150154027 | 5.3638075948  | 2.4510231294  |
| 59 | C  | -4.0752284792 | 4.3686757584  | 3.1740287295  |
| 60 | C  | -3.3150154027 | 3.9885692202  | 4.3438763646  |
| 61 | Li | -0.9525140512 | 1.5412001096  | 1.1197474238  |
| 62 | H  | -1.6919280282 | 2.7375970562  | 1.9889806858  |

---

## DF-LMP2/VTZ optimized structure of LiF@C60 (C5v)

|    |   |               |               |               |
|----|---|---------------|---------------|---------------|
| 1  | C | -0.8900545762 | 0.0649286063  | -0.8464922046 |
| 2  | C | 0.3399705963  | 0.8251259699  | -0.8464922046 |
| 3  | C | 1.1001679599  | 0.4450272881  | 0.3233312509  |
| 4  | C | 0.3399705963  | -0.5500839799 | 1.0463219073  |
| 5  | C | -0.8900545762 | -0.7849978844 | 0.3233312509  |
| 6  | C | -0.8900545762 | 0.0649286063  | 4.3434991969  |
| 7  | C | -0.8900545762 | -0.7849978844 | 3.1736757414  |
| 8  | C | 0.3399705963  | -0.5500839799 | 2.4506850851  |
| 9  | C | 1.1001679599  | 0.4450272881  | 3.1736757414  |
| 10 | C | 0.3399705963  | 0.8251259699  | 4.3434991969  |
| 11 | C | -0.8900545762 | 2.7757673076  | -1.7272970919 |
| 12 | C | -0.8900545762 | 4.1509772575  | -1.2804642928 |
| 13 | C | 0.3399705963  | 4.3858911619  | -0.5574736364 |
| 14 | C | 1.1001679599  | 3.1558659894  | -0.5574736364 |
| 15 | C | 0.3399705963  | 2.1607547214  | -1.2804642928 |
| 16 | C | -0.8900545762 | 2.7757673076  | 5.2243040843  |
| 17 | C | 0.3399705963  | 2.1607547214  | 4.7774712851  |
| 18 | C | 1.1001679599  | 3.1558659894  | 4.0544806288  |
| 19 | C | 0.3399705963  | 4.3858911619  | 4.0544806288  |
| 20 | C | -0.8900545762 | 4.1509772575  | 4.7774712851  |
| 21 | C | -2.0846772486 | 2.0374498924  | 5.2243040843  |
| 22 | C | -3.3147024211 | 2.6524624786  | 4.7774712851  |
| 23 | C | -4.0748997847 | 1.6573512106  | 4.0544806288  |
| 24 | C | -3.3147024211 | 0.4273260381  | 4.0544806288  |
| 25 | C | -2.0846772486 | 0.6622399425  | 4.7774712851  |
| 26 | C | -2.0846772486 | 0.6622399425  | -1.2804642928 |
| 27 | C | -3.3147024211 | 0.4273260381  | -0.5574736364 |
| 28 | C | -4.0748997847 | 1.6573512106  | -0.5574736364 |
| 29 | C | -3.3147024211 | 2.6524624786  | -1.2804642928 |
| 30 | C | -2.0846772486 | 2.0374498924  | -1.7272970919 |
| 31 | C | 1.8384853752  | 1.4114973319  | 1.0255128398  |
| 32 | C | 1.8384853752  | 2.7867072818  | 0.5786800407  |
| 33 | C | 1.8384853752  | 3.6366337725  | 1.7485034962  |
| 34 | C | 1.8384853752  | 2.7867072818  | 2.9183269517  |
| 35 | C | 1.8384853752  | 1.4114973319  | 2.4714941525  |
| 36 | C | -2.0846772486 | -1.0131505129 | 1.0255128398  |
| 37 | C | -2.0846772486 | -1.0131505129 | 2.4714941525  |
| 38 | C | -3.3147024211 | -0.3981379267 | 2.9183269517  |
| 39 | C | -4.0748997847 | -0.0180392449 | 1.7485034962  |
| 40 | C | -3.3147024211 | -0.3981379267 | 0.5786800407  |
| 41 | C | -4.8132172000 | 2.0265099182  | 2.9183269517  |
| 42 | C | -4.8132172000 | 3.4017198680  | 2.4714941525  |
| 43 | C | -4.8132172000 | 3.4017198680  | 1.0255128398  |
| 44 | C | -4.8132172000 | 2.0265099182  | 0.5786800407  |
| 45 | C | -4.8132172000 | 1.1765834275  | 1.7485034962  |
| 46 | C | -0.8900545762 | 5.8263677129  | 1.0255128398  |
| 47 | C | -0.8900545762 | 5.8263677129  | 2.4714941525  |
| 48 | C | 0.3399705963  | 5.2113551267  | 2.9183269517  |
| 49 | C | 1.1001679599  | 4.8312564449  | 1.7485034962  |
| 50 | C | 0.3399705963  | 5.2113551267  | 0.5786800407  |
| 51 | C | -4.0748997847 | 4.3681899119  | 0.3233312509  |
| 52 | C | -3.3147024211 | 5.3633011799  | 1.0463219073  |
| 53 | C | -2.0846772486 | 5.5982150844  | 0.3233312509  |
| 54 | C | -2.0846772486 | 4.7482885937  | -0.8464922046 |
| 55 | C | -3.3147024211 | 3.9880912301  | -0.8464922046 |
| 56 | C | -2.0846772486 | 4.7482885937  | 4.3434991969  |
| 57 | C | -2.0846772486 | 5.5982150844  | 3.1736757414  |

|    |    |               |              |              |
|----|----|---------------|--------------|--------------|
| 58 | C  | -3.3147024211 | 5.3633011799 | 2.4506850851 |
| 59 | C  | -4.0748997847 | 4.3681899119 | 3.1736757414 |
| 60 | C  | -3.3147024211 | 3.9880912301 | 4.3434991969 |
| 61 | Li | -0.9557814468 | 1.5464868668 | 1.1235884777 |
| 62 | F  | -1.6911490548 | 2.7363366508 | 1.9880649477 |

---

62

DF-LMP2/VTZ optimized structure of BN@C60 (C2v)

|    |   |               |               |               |
|----|---|---------------|---------------|---------------|
| 1  | C | -0.8890400849 | 0.0532344128  | -0.8993450137 |
| 2  | C | 0.3499749320  | 0.8189864043  | -0.8993467602 |
| 3  | C | 1.1100669443  | 0.4816040770  | 0.2803521295  |
| 4  | C | 0.2656703523  | -0.4298605166 | 1.0298652205  |
| 5  | C | -0.9271982475 | -0.7774918425 | 0.2803535032  |
| 6  | C | -0.8866311262 | 0.0493408708  | 4.3790262032  |
| 7  | C | -0.9258520836 | -0.7796645129 | 3.1981566315  |
| 8  | C | 0.2663434304  | -0.4309546040 | 2.4480984652  |
| 9  | C | 1.1114057839  | 0.4794321787  | 3.1981549717  |
| 10 | C | 0.3523819782  | 0.8150939542  | 4.3790252175  |
| 11 | C | -0.8925727462 | 2.7799488477  | -1.7413347372 |
| 12 | C | -0.8910113547 | 4.1507721971  | -1.2869775315 |
| 13 | C | 0.3347977625  | 4.3782847800  | -0.5582499331 |
| 14 | C | 1.0934609447  | 3.1500904912  | -0.5580631651 |
| 15 | C | 0.3367968945  | 2.1640027361  | -1.2992625333 |
| 16 | C | -0.8893989205 | 2.7748150837  | 5.2250398950  |
| 17 | C | 0.3395656840  | 2.1595195565  | 4.7809279010  |
| 18 | C | 1.0955614272  | 3.1467042156  | 4.0405132882  |
| 19 | C | 0.3368957698  | 4.3748945409  | 4.0432021874  |
| 20 | C | -0.8882498158 | 4.1463063278  | 4.7727085849  |
| 21 | C | -2.0841181364 | 2.0364374096  | 5.2250411495  |
| 22 | C | -3.3113314530 | 2.6487585772  | 4.7727105482  |
| 23 | C | -4.0636875183 | 1.6551833015  | 4.0432029374  |
| 24 | C | -3.3044471414 | 0.4273483146  | 4.0405164185  |
| 25 | C | -2.0833894929 | 0.6620503021  | 4.7809299131  |
| 26 | C | -2.0861678219 | 0.6665275641  | -1.2992617157 |
| 27 | C | -3.3065419909 | 0.4307390755  | -0.5580625149 |
| 28 | C | -4.0657889765 | 1.6585733189  | -0.5582512958 |
| 29 | C | -3.3140949401 | 2.6532247617  | -1.2869766253 |
| 30 | C | -2.0872953076 | 2.0415698687  | -1.7413346528 |
| 31 | C | 1.8748697489  | 1.4191033318  | 1.0094538263  |
| 32 | C | 1.8556658791  | 2.7918248009  | 0.5695075424  |
| 33 | C | 1.8497048859  | 3.6382723363  | 1.7412422885  |
| 34 | C | 1.8567203563  | 2.7900932279  | 2.9117178297  |
| 35 | C | 1.8755336912  | 1.4180159184  | 2.4697414645  |
| 36 | C | -2.1077513239 | -1.0422876406 | 1.0094557843  |
| 37 | C | -2.1070761712 | -1.0433726999 | 2.4697427332  |
| 38 | C | -3.3258867657 | -0.4129371262 | 2.9117210678  |
| 39 | C | -4.0813836142 | -0.0273422707 | 1.7412449306  |
| 40 | C | -3.3269633473 | -0.4112133476 | 0.5695107608  |
| 41 | C | -4.8049760149 | 2.0227491752  | 2.9112224092  |
| 42 | C | -4.8066146612 | 3.3964464682  | 2.4662293320  |
| 43 | C | -4.8072725756 | 3.3975091323  | 1.0219667909  |
| 44 | C | -4.8060382303 | 2.0244684098  | 0.5749500542  |
| 45 | C | -4.8042025620 | 1.1741440936  | 1.7424602089  |
| 46 | C | -0.8889490093 | 5.8191686965  | 1.0219670271  |
| 47 | C | -0.8882924596 | 5.8181015693  | 2.4662297846  |
| 48 | C | 0.3396482391  | 5.2023006578  | 2.9112209654  |
| 49 | C | 1.0983170174  | 4.8221021306  | 1.7424580503  |
| 50 | C | 0.3385833031  | 5.2040218292  | 0.5749490319  |

|    |   |               |              |               |
|----|---|---------------|--------------|---------------|
| 51 | C | -4.0704504415 | 4.3637627212 | 0.3213448018  |
| 52 | C | -3.3114211364 | 5.3579906431 | 1.0435924963  |
| 53 | C | -2.0827088803 | 5.5922543438 | 0.3213441753  |
| 54 | C | -2.0829924546 | 4.7441658836 | -0.8478089837 |
| 55 | C | -3.3117708160 | 3.9847392719 | -0.8478080197 |
| 56 | C | -2.0806315348 | 4.7403465730 | 4.3355024055  |
| 57 | C | -2.0814142500 | 5.5901620925 | 3.1676046670  |
| 58 | C | -3.3107820713 | 5.3569555413 | 2.4461300599  |
| 59 | C | -4.0691569083 | 4.3616680973 | 3.1676048493  |
| 60 | C | -3.3094087553 | 3.9809193554 | 4.3355028688  |
| 61 | B | -0.6478300406 | 1.0482089635 | 1.7402566100  |
| 62 | N | -1.3326078088 | 2.1562377017 | 1.7416655702  |

-----

62

DF-LMP2/VTZ optimized structure of BeO@C60 (C5v)

|    |   |               |               |               |
|----|---|---------------|---------------|---------------|
| 1  | C | -0.8896730040 | 0.0649007710  | -0.8461293078 |
| 2  | C | 0.3398248486  | 0.8247722330  | -0.8461293078 |
| 3  | C | 1.0996963106  | 0.4448365020  | 0.3231926367  |
| 4  | C | 0.3398248486  | -0.5498481553 | 1.0458733422  |
| 5  | C | -0.8896730040 | -0.7846613506 | 0.3231926367  |
| 6  | C | -0.8896730040 | 0.0649007710  | 4.3424761985  |
| 7  | C | -0.8896730040 | -0.7846613506 | 3.1731542541  |
| 8  | C | 0.3398248486  | -0.5498481553 | 2.4504735486  |
| 9  | C | 1.0996963106  | 0.4448365020  | 3.1731542541  |
| 10 | C | 0.3398248486  | 0.8247722330  | 4.3424761985  |
| 11 | C | -0.8896730040 | 2.7753753384  | -1.7268158809 |
| 12 | C | -0.8896730040 | 4.1499957267  | -1.2801746419 |
| 13 | C | 0.3398248486  | 4.3848089220  | -0.5574939364 |
| 14 | C | 1.0996963106  | 3.1553110694  | -0.5574939364 |
| 15 | C | 0.3398248486  | 2.1606264121  | -1.2801746419 |
| 16 | C | -0.8896730040 | 2.7753753384  | 5.2231627716  |
| 17 | C | 0.3398248486  | 2.1606264121  | 4.7765215326  |
| 18 | C | 1.0996963106  | 3.1553110694  | 4.0538408271  |
| 19 | C | 0.3398248486  | 4.3848089220  | 4.0538408271  |
| 20 | C | -0.8896730040 | 4.1499957267  | 4.7765215326  |
| 21 | C | -2.0844973049 | 2.0369333098  | 5.2231627716  |
| 22 | C | -3.3139951575 | 2.6516822361  | 4.7765215326  |
| 23 | C | -4.0738666195 | 1.6569975788  | 4.0538408271  |
| 24 | C | -3.3139951575 | 0.4274997262  | 4.0538408271  |
| 25 | C | -2.0844973049 | 0.6623129215  | 4.7765215326  |
| 26 | C | -2.0844973049 | 0.6623129215  | -1.2801746419 |
| 27 | C | -3.3139951575 | 0.4274997262  | -0.5574939364 |
| 28 | C | -4.0738666195 | 1.6569975788  | -0.5574939364 |
| 29 | C | -3.3139951575 | 2.6516822361  | -1.2801746419 |
| 30 | C | -2.0844973049 | 2.0369333098  | -1.7268158809 |
| 31 | C | 1.8381383392  | 1.4114696668  | 1.0254927399  |
| 32 | C | 1.8381383392  | 2.7860900551  | 0.5788515009  |
| 33 | C | 1.8381383392  | 3.6356521767  | 1.7481734454  |
| 34 | C | 1.8381383392  | 2.7860900551  | 2.9174953899  |
| 35 | C | 1.8381383392  | 1.4114696668  | 2.4708541509  |
| 36 | C | -2.0844973049 | -1.0128524868 | 1.0254927399  |
| 37 | C | -2.0844973049 | -1.0128524868 | 2.4708541509  |
| 38 | C | -3.3139951575 | -0.3981035605 | 2.9174953899  |
| 39 | C | -4.0738666195 | -0.0181678295 | 1.7481734454  |
| 40 | C | -3.3139951575 | -0.3981035605 | 0.5788515009  |
| 41 | C | -4.8123086481 | 2.0262185931  | 2.9174953899  |
| 42 | C | -4.8123086481 | 3.4008389814  | 2.4708541509  |
| 43 | C | -4.8123086481 | 3.4008389814  | 1.0254927399  |

|    |    |               |              |               |
|----|----|---------------|--------------|---------------|
| 44 | C  | -4.8123086481 | 2.0262185931 | 0.5788515009  |
| 45 | C  | -4.8123086481 | 1.1766564715 | 1.7481734454  |
| 46 | C  | -0.8896730040 | 5.8251611349 | 1.0254927399  |
| 47 | C  | -0.8896730040 | 5.8251611349 | 2.4708541509  |
| 48 | C  | 0.3398248486  | 5.2104122086 | 2.9174953899  |
| 49 | C  | 1.0996963106  | 4.8304764776 | 1.7481734454  |
| 50 | C  | 0.3398248486  | 5.2104122086 | 0.5788515009  |
| 51 | C  | -4.0738666195 | 4.3674721461 | 0.3231926367  |
| 52 | C  | -3.3139951575 | 5.3621568034 | 1.0458733422  |
| 53 | C  | -2.0844973049 | 5.5969699987 | 0.3231926367  |
| 54 | C  | -2.0844973049 | 4.7474078771 | -0.8461293078 |
| 55 | C  | -3.3139951575 | 3.9875364151 | -0.8461293078 |
| 56 | C  | -2.0844973049 | 4.7474078771 | 4.3424761985  |
| 57 | C  | -2.0844973049 | 5.5969699987 | 3.1731542541  |
| 58 | C  | -3.3139951575 | 5.3621568034 | 2.4504735486  |
| 59 | C  | -4.0738666195 | 4.3674721461 | 3.1731542541  |
| 60 | C  | -3.3139951575 | 3.9875364151 | 4.3424761985  |
| 61 | Be | -0.7964949868 | 1.2887559605 | 0.9363360135  |
| 62 | O  | -1.4128854565 | 2.2860966908 | 1.6609464690  |

---
